# Supplementary material for: Structural and Functional Characterization of a New Bacterial Dipeptidyl Peptidase III Involved in Fruiting Body Formation in Myxobacteria
Source: MDPI journal article supplement (doi:10.3390/ijms24010631), 2022-12-30
Supplement: s1 [file s1]

# **Structural and Functional Characterization of a New Bacterial Dipeptidyl Peptidase III Involved in Fruiting Body Formation in Myxobacteria**

**Si-Bo Chen<sup>1</sup>, Han Zhang<sup>1</sup>, Si Chen<sup>1</sup>, Xian-Feng Ye<sup>1</sup>, Zhou-Kun Li<sup>1</sup>, Wei-Dong Liu<sup>2</sup>, Zhong-Li Cui<sup>1</sup> and Yan Huang<sup>1,\*</sup>**

<sup>1</sup> Key Laboratory of Agricultural Environmental Microbiology, Ministry of Agriculture and Rural Affairs, College of Life Sciences, Nanjing Agricultural University, Nanjing 210095, China

<sup>2</sup> Industrial Enzymes National Engineering Laboratory, Tianjin Institute of Industrial Biotechnology, Chinese Academy of Sciences, Tianjin 300308, China

\* Correspondence: [huangyan@njau.edu.cn](mailto:huangyan@njau.edu.cn)

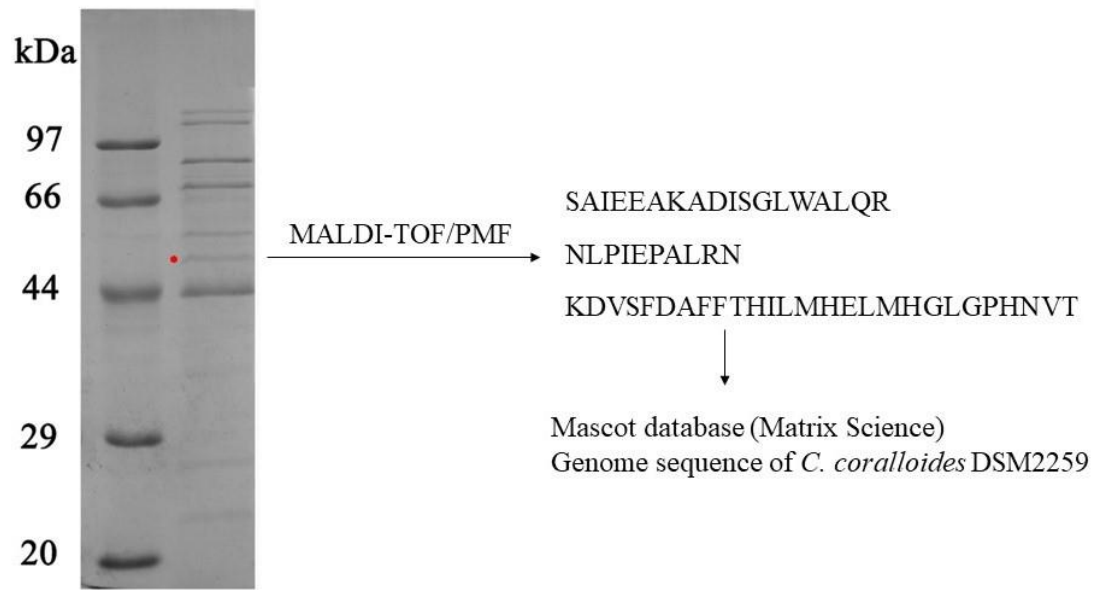

**Figure. S1** The MALDI-TOF result of the extracellular protein from *Coralloccoccus* sp. EGB

[illegible]

[illegible]

**Figure. S2** Multiple sequence alignment of DPP III from various species. The organisms and UniProt sequence identifiers are *Monodelphis domestica* (F6ZXH8), *Sarcophilus harrisii* (A0A7N4P2W4), *Homo sapiens* (Q9NY33), *Rattus norvegicus* (O55096), *Crotalus adamanteus* (J3RZ30), *Xenopus laevis* (Q6DE90), *Salmo salar* (B5X435), *Drosophila mojavensis* (B4K999), *Glossina morsitans* (D3TMQ7), *Daphnia pulex* (E9GTX0), *Necator americanus* (W2SLT7), *Caenorhabditis elegans* (G5ECW7), *Syphacia muris* (A0A0N5AXJ5), *Schizophyllum commune* (D8PVF6), *Saccharomyces cerevisiae* (Q08225), *Aureobasidium pullulans* (A0A074XX23), *Flavobacteriales bacterium* (A4AQA4), *Croceibacter atlanticus* (A3U8C5), *Bacteroides cellulosilyticus* (E2NMV7), *Prevotella marshii* (E0NQE0), *Bacteroides thetaiotaomicron* (A0A139KC05), *Porphyromonas gingivalis* (Q7MX92), *Anaeromyxobacter dehalogenans* (Q2IN78), *Corallococcus* sp. EGB (A0A5H1ZR28), *Caldithrix abyssi* (H1XW48), *Setaria italica* (K3YPW2), *Physcomitrella patens* (A9TLP4), *Arabidopsis thaliana* (Q8L831). Dots indicate gaps. Identical amino acid residues at the same position are shaded.

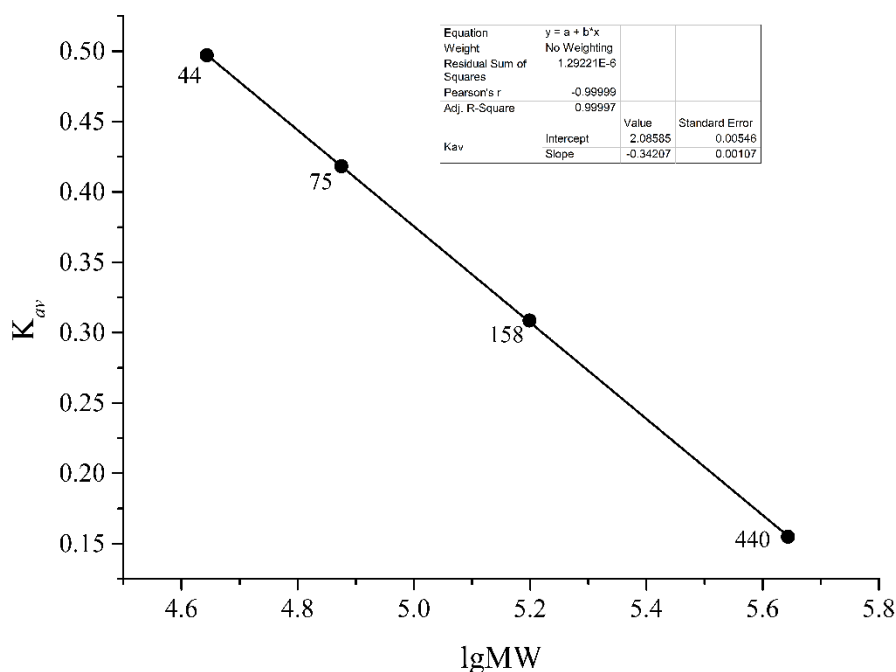

**Figure. S3** The calibration curve  $\lg MW$  vs  $K_{av}$ . The equation is  $K_{av} = 2.08585 - 0.34207 \lg MW$ , where the  $K_{av}$  is distribution coefficient,  $MW$  is the molecular weight of the standard samples. The  $V_e$ ,  $K_{av}$  and  $\lg MW$  for CoDPP III is 71.95 mL, 0.3513 and 5.0708, respectively.

**Table S1** Effect of metal ions on CoDPP III activity

| Metal ions       | Relative activity (%) |            |            |
|------------------|-----------------------|------------|------------|
|                  | 0.1 mM                | 0.5 mM     | 1.0 mM     |
| No addition      | 100                   | 100        | 100        |
| Zn <sup>2+</sup> | 78.15±0.6             | 10.6±0.1   | -          |
| Co <sup>2+</sup> | 141.06±1.2            | 121.19±2.2 | 105.2±2.4  |
| Mn <sup>2+</sup> | 129.14±3.3            | 111.92±2.1 | 98.92±2.1  |
| Mg <sup>2+</sup> | 119.21±1.6            | 129.8±2.7  | 109.7±1.5  |
| Ba <sup>2+</sup> | 121.19±0.9            | 123.18±1.3 | 105.93±1.2 |
| Ca <sup>2+</sup> | 116.56±0.8            | 121.19±2.1 | 114.21±2.1 |
| Cu <sup>2+</sup> | 4.64±0.1              | -          | -          |
| Ni <sup>2+</sup> | 7.95±0.2              | 5.96±0.1   | -          |

**Table S2** Strains and plasmids used in this study

| Strains and plasmids                   | Relevant genotype or characteristic(s)                                                                                                      | Reference  |
|----------------------------------------|---------------------------------------------------------------------------------------------------------------------------------------------|------------|
| <i>Corallococcus</i> sp. EGB           | wild type                                                                                                                                   | [45]       |
| <i>E. coli</i>                         |                                                                                                                                             |            |
| <i>E. coli</i> BL21(DE3)               | F- <i>ompT hsdS</i> (r <sub>B</sub> <sup>-</sup> m <sub>B</sub> <sup>-</sup> ) <i>gal dcm lacY1</i> (DE3)                                   | Novagen    |
| <i>E. coli</i> B834(DE3)               | F- <i>ompT hsdS</i> (r <sub>B</sub> <sup>-</sup> m <sub>B</sub> <sup>-</sup> ) <i>gal dcm met</i> (DE3)                                     | Novagen    |
| <i>M. xanthus</i>                      |                                                                                                                                             |            |
| DK1622                                 | wild type                                                                                                                                   | [46]       |
| DK1622- <i>Codpp</i> III               | <i>attB</i> ::pET29a- <i>attP</i> - <i>Codpp</i> III                                                                                        | This study |
| DK1622-Δ <i>asgA</i>                   | DK1622 mutant with <i>asgA</i> gene disrupted                                                                                               | This study |
| <b>Plasmids</b>                        |                                                                                                                                             |            |
| pET29a                                 | pBR322 ori, Kan <sup>r</sup>                                                                                                                | Novagen    |
| pBJ113                                 | pBR322 ori, galK; Kan <sup>r</sup>                                                                                                          | [47]       |
| pET29a- <i>Codpp</i> III               | <i>Codpp</i> III inserted into <i>Nde</i> I/ <i>Xho</i> I site of pET29a                                                                    | This study |
| pET29a- <i>attP</i>                    | pET29a derivative carrying the MX8 <i>attP</i> region, Kan <sup>r</sup>                                                                     | This study |
| pET29a- <i>attP</i> - <i>Codpp</i> III | A 2.7 kb fragment containing <i>Codpp</i> III gene and its promoter inserted into <i>Hind</i> III/ <i>Xho</i> I site of pET29a- <i>attP</i> | This study |
| pBJ113- <i>asgA</i>                    | 1073 bp internal fragment of <i>asgA</i> inserted into <i>Hind</i> III/ <i>Eco</i> R I site of pBJ113                                       | This study |
